# Supplementary material
Source: PubMed Central journal article supplement (PMC1895723)
Supplement: blood_2005-06-2373_1.pdf [file blood_2005-06-2373_1.pdf]

| Parameter                  | All Patients |          | No Hydroxyurea |          | Hydroxyurea |          |
|----------------------------|--------------|----------|----------------|----------|-------------|----------|
|                            | n            | r        | n              | r        | n           | r        |
| Hemoglobin                 | 212          | -0.56*** | 129            | -0.62*** | 83          | -0.46*** |
| Plasma Hb                  | 162          | 0.45***  | 101            | 0.44***  | 61          | 0.53***  |
| Reticulocyte count         | 202          | 0.43***  | 123            | 0.45***  | 79          | 0.27*    |
| Haptoglobin                | 167          | -0.26*** | 103            | -0.27**  | 64          | -0.18    |
| Hemoglobin S               | 212          | 0.36***  | 129            | 0.38***  | 83          | 0.33**   |
| Hemoglobin F               | 212          | 0.08     | 129            | 0.20*    | 73          | -0.06    |
| Arginase                   | 119          | 0.35***  | 72             | 0.29*    | 47          | 0.47***  |
| Aspartate aminotransferase | 213          | 0.74***  | 130            | 0.75***  | 83          | 0.66***  |
| Indirect bilirubin         | 213          | 0.55***  | 130            | 0.54***  | 83          | 0.51***  |
| Direct bilirubin           | 213          | 0.55***  | 130            | 0.58***  | 83          | 0.47***  |
| Alanine aminotransferase   | 213          | 0.34***  | 130            | 0.36***  | 83          | 0.29**   |
| Alkaline phosphatase       | 213          | 0.17*    | 130            | 0.20*    | 83          | 0.12     |
| Leukocyte count            | 212          | 0.34***  | 129            | 0.33***  | 83          | 0.28**   |
| Creatine kinase            | 212          | -0.14*   | 130            | -0.16    | 82          | -0.11    |
| Creatinine                 | 213          | -0.10    | 130            | -0.05    | 83          | -0.18    |
| sVCAM-1                    | 161          | 0.38***  | 100            | 0.45***  | 61          | 0.22     |
| sICAM-1                    | 155          | 0.16*    | 97             | 0.15     | 58          | 0.16     |
| sE-selectin                | 152          | 0.28***  | 95             | 0.16     | 57          | 0.35**   |
| sP-selectin                | 157          | 0.16*    | 96             | 0.21*    | 61          | 0.00     |
| Oxygen saturation          | 142          | -0.44*** | 95             | -0.46*** | 47          | -0.38**  |

\*p<0.05; \*\*p<0.01; \*\*\*p<0.001
